# Supplementary material for: Synchronous recovery of iron and electricity using a single chamber air-cathode microbial fuel cell
Source: Royal Society of Chemistry journal article supplement (doi:10.1039/c6ra28148f), 2017-01-01
Supplement: c6ra28148f1.pdf [file c6ra28148f1.pdf]

## **Synchronous recovery of iron and electricity using single chamber air-cathode microbial fuel cell**

Xiufen Li<sup>a,b\*</sup>, Yan Zheng<sup>a,b</sup>, Pengfei Nie<sup>a,b</sup>, Yueping Ren<sup>a,b</sup>, Xinhua Wang<sup>a,b</sup>, Yanfei Liu<sup>c</sup>

<sup>a</sup> Laboratory of Environmental Biotechnology, School of Environmental and Civil Engineering,

Jiangnan University, Wuxi 214122, PR China

<sup>b</sup> Jiangsu Key Laboratory of Anaerobic Biotechnology, Wuxi 214122, PR China

<sup>c</sup> School of Chemistry and Chemical Engineering, Central South University, Changsha 410083,

PR China

---

\* Address correspondence to Professor Xiufen Li, Laboratory of Environmental Biotechnology, School of Environmental and Civil Engineering, Jiangnan University, Wuxi 214122, China.  
E-mail: xfli@jiangnan.edu.cn. Tel.: +86 510 85326516.

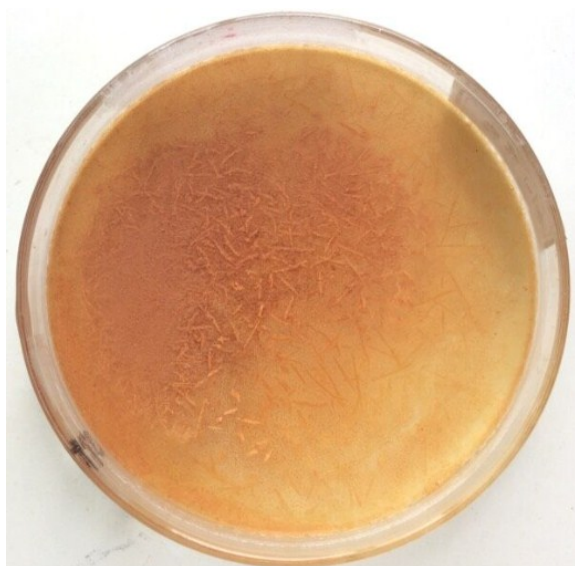

**Fig. S1 – Morphology of air-dried precipitate recovered from the Inoculated MFC reactor.**
